# Supplementary material for: Experimental Traumatic Brain Injury Induces Chronic Glutamatergic Dysfunction in Amygdala Circuitry Known to Regulate Anxiety-Like Behavior
Source: PubMed Central journal article supplement (PMC6985437; doi:10.3389/fnins.2019.01434), 2020-01-21

# Supplementary Figure 4

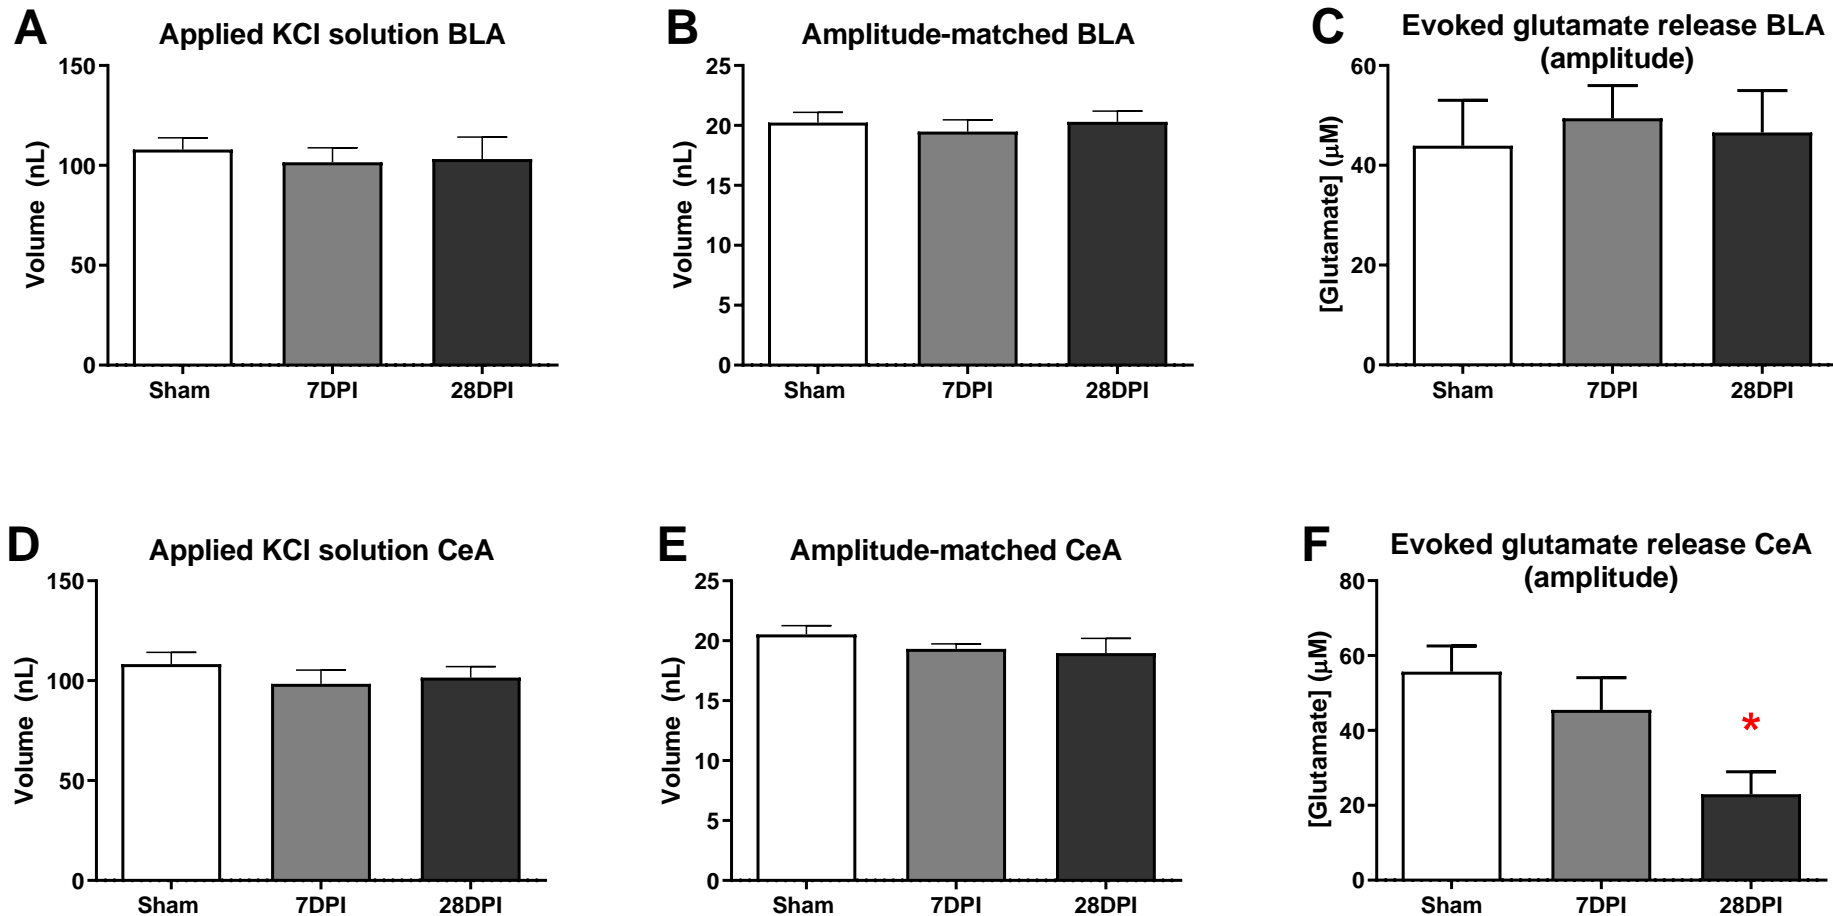

Supplement: Image_4.pdf [file Image_4.pdf]
