# Supplementary material for: Experimental Traumatic Brain Injury Induces Chronic Glutamatergic Dysfunction in Amygdala Circuitry Known to Regulate Anxiety-Like Behavior
Source: PubMed Central journal article supplement (PMC6985437; doi:10.3389/fnins.2019.01434), 2020-01-21
Supplement: Table_1.pdf [file Table_1.pdf]

| Antibody      | Species | Ig company, catalog # | Denaturing Temp (celcius) | [Protein] $\mu\text{g}/\mu\text{l}$ | [Ig]  | Biological control |
|---------------|---------|-----------------------|---------------------------|-------------------------------------|-------|--------------------|
| BDNF          | Mouse   | Abcam ab108319        | 37Cx30min                 | 0.5 $\mu\text{g}/\mu\text{l}$       | 1:50  | GAPDH              |
| GLUR/NR3C1    | Rb      | Neo A2164             | 37Cx30min                 | 0.5 $\mu\text{g}/\mu\text{l}$       | 1:25  | GAPDH              |
| TrkB          | Rb      | Abcam ab18987         | 37Cx30 min                | 0.5 $\mu\text{g}/\mu\text{l}$       | 1:100 | GAPDH              |
| GLT-1 (EAAT2) | Rb      | Abcam ab205248        | 37Cx30 min                | 0.1 $\mu\text{g}/\mu\text{l}$       | 1:25  | GAPDH              |
| Glast (EAAT1) | Rb      | Abcam ab181036        | 37Cx30 min                | 0.5 $\mu\text{g}/\mu\text{l}$       | 1:25  | GAPDH              |
| mGluR2        | Rb      | Abcam ab150387        | 37Cx30 min                | 0.1 $\mu\text{g}/\mu\text{l}$       | 1:100 | GAPDH              |
| Gapdh         | mouse   | Abcam ab8245          | 37Cx30 min                | 0.5 $\mu\text{g}/\mu\text{l}$       | 1:25  |                    |
